# Supplementary material for: Enhancement of seaweed polysaccharides (fucoidan and laminarin) on the phagocytosis of macrophages via activation of intelectin in blunt snout bream (Megalobrama amblycephala)
Source: Frontiers journal article supplement (doi:10.3389/fmars.2023.1124880), 2023-03-10
Supplement: Data_Sheet_1.docx [file Data_Sheet_1.docx]

**Supplemental materials**


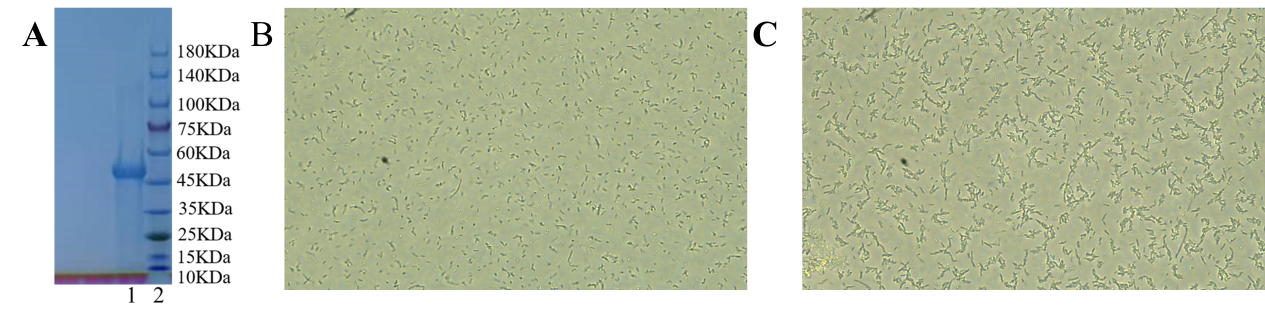


**Supplemental Fig. 1**. Expression, purification and activity validation of rMaINTL protein. (A) rMaINTL protein expression and purification. Lane 1: purified rMaINTL protein. lane 2: protein markers. (B) Validation of the agglutinative activity of inactivated rMaINTL protein against *Aeromonas hydrophila*. (C) Validation of the agglutinative activity of rMaINTL protein against *A. hydrophila.*
